# Supplementary material
Source: Springer Nature journal article supplement (https://www.springermedizin.de/resource/supplementary/12888_2013_1455_MOESM1_ESM.pdf/9480276)
Supplement: MOESM1 [file 9480276]

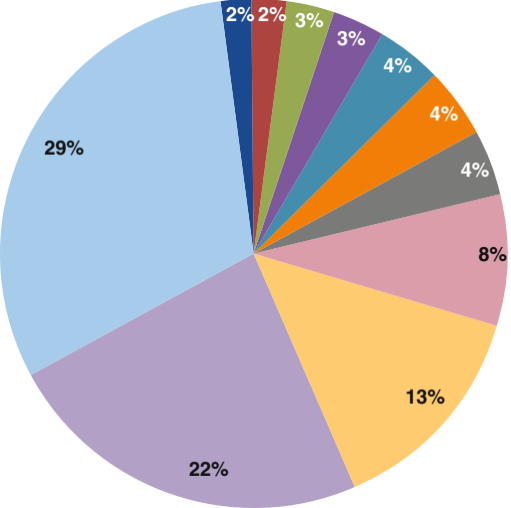

- Compliance
- Negative Symptoms
- Other Mood Disorder Symptoms and Comorbidities
- Small Talk
- Life Events and Other Causes of Schizophrenia
- Non-psychiatric Comorbidities
- Side Effects
- Schizophrenia Diagnosis, Disease History, and Education
- Positive Symptoms
- Behavior Modification and Counseling
- Treatment Discussion
